# Supplementary material for: Temporal characteristics of atmospheric ammonia and nitrogen dioxide over China based on emission data, satellite observations and atmospheric transport modeling since 1980
Source: Copernicus journal article supplement (doi:10.5194/acp-2017-106), 2017-03-21
Supplement: Supplementary file 1 [file acp-2017-106-supplement.pdf]

**Supplementary material**

**Temporal characteristics of atmospheric ammonia and nitrogen dioxide over China based on emission data, satellite observations and atmospheric transport modeling since 1980**

Lei Liu <sup>a</sup>, Xiuying Zhang <sup>a,\*</sup>, Wen Xu <sup>b</sup>, Xuejun Liu <sup>b</sup>, Yi Li <sup>c</sup>, Xuehe Lu <sup>a</sup>, Yuehan Zhang <sup>d</sup>, Wuting Zhang <sup>a,c</sup>

<sup>a</sup> Jiangsu Provincial Key Laboratory of Geographic Information Science and Technology, International Institute for Earth System Science, Nanjing University, Nanjing 210023, China

<sup>b</sup> College of Resources and Environmental Sciences, Centre for Resources, Environment and Food Security, Key Lab of Plant-Soil Interactions of MOE, China Agricultural University, Beijing 100193, China

<sup>c</sup> Air Quality Division, Arizona Department of Environmental Quality, Phoenix, AZ, 85007, USA

<sup>d</sup> School of Atmospheric Sciences, Nanjing University, Nanjing, China

<sup>e</sup> Jiangsu Center for Collaborative Innovation in Geographical Information Resource Development and Application, Nanjing 210023, China

\* Corresponding authors: Xiuying Zhang ([lzhxy77@163.com](mailto:lzhxy77@163.com))

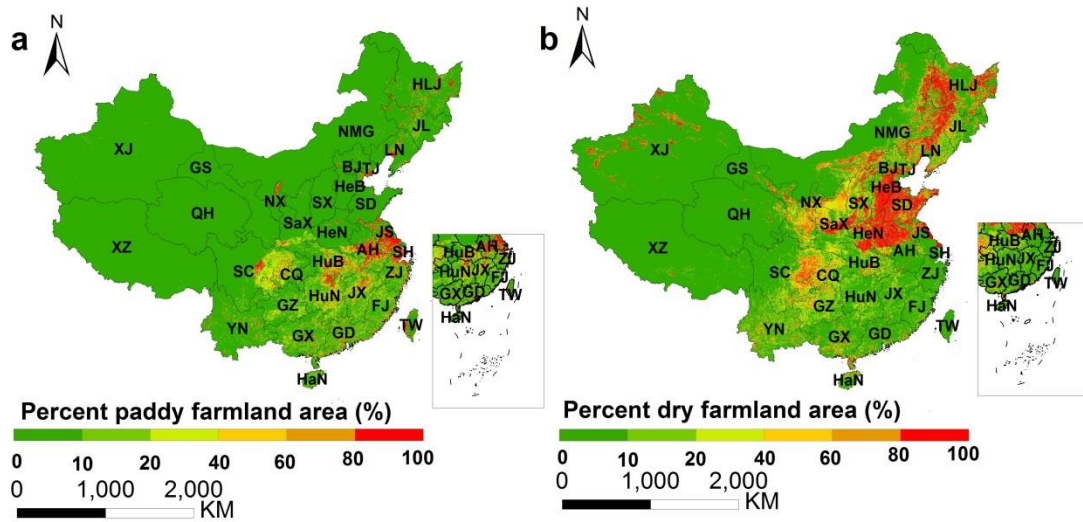

**Fig. S1.** Percent farmland area. This refers to the Tsinghua University 30 meter resolution global land cover product of 2010 (<http://data.ess.tsinghua.edu.cn>). The map was generated by using ArcGIS 10.2 software.

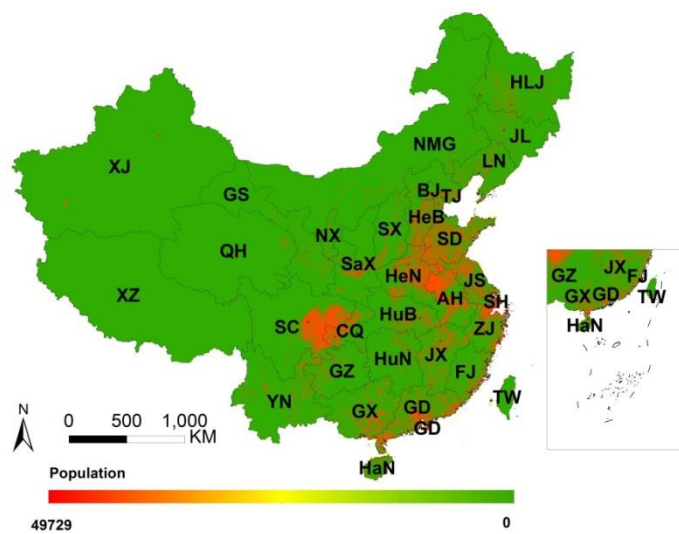

**Fig. S2.** The distribution of population (people/km<sup>2</sup>) in China in 2010.
