# Supplementary material for: Temporal characteristics of atmospheric ammonia and nitrogen dioxide over China based on emission data, satellite observations and atmospheric transport modeling since 1980
Source: Copernicus journal article supplement (doi:10.5194/acp-2017-106), 2017-03-21
Supplement: Supplementary file [file acp-2017-106-AC1-supplement.pdf]

## **Referee #1**

We are grateful to the reviewer for the time and energy in providing helpful comments and guidance that have improved the manuscript. In this document, we describe how we have addressed the reviewer's comments. Detailed responses to each comment are given below (in blue).

This manuscript presents an overview of the temporal characteristics of various datasets relevant to NO<sub>x</sub> and NH<sub>3</sub> abundance over China. The authors discuss trends in emission inventories (EDGAR and REAS), trends in satellite NO<sub>2</sub> and NH<sub>3</sub> columns (from OMI and IASI respectively), and trends in MOZART-4 model output for the region. Decreasing NO<sub>2</sub> since 2011 suggests that China's 12th Five Year Plan has resulted in successful emission reductions. On the other hand, the lack of a significant trend in NH<sub>3</sub> points to the growing importance of controlling and monitoring reduced nitrogen. The authors are to be commended for compiling and exploring multiple datasets in determining patterns in reactive nitrogen over China. However, I have some general comments about the overall scientific significance and scientific quality. I look forward to hearing from the authors in this discussion phase.

### **Major comments:**

(1) While the analysis of IASI NH<sub>3</sub> columns focusing on China might be somewhat new, I find the analysis of OMI NO<sub>2</sub> that is presented in this manuscript lacking in novelty or insight. In particular, I would refer the authors to de Foy et al. (2016) and to Liu et al. (2016). Both of these studies use OMI NO<sub>2</sub> observations from 2005-2015 to discuss long-term trends and the 2011 peak in NO<sub>2</sub> over China in detail. In my opinion, the observations made by the authors of this present manuscript have not added new insight into this discussion (and in fact treat the analysis with less rigor, as I will discuss below). In its current state, I am concerned that this manuscript does not represent a substantial enough contribution. I encourage the authors to refer to the above references and explicitly address what new

insight is gained from their analysis.

The new insights gained from this study are for Ammonia ( $\text{NH}_3$ ) as well as the potential interactive impact between  $\text{NO}_2$  and  $\text{NH}_3$ . The temporal trend analysis of  $\text{NH}_3$  columns over China in the present work is relatively new, and to date studies focusing on the  $\text{NH}_3$  trends based on the IASI observations over China are still few.

Although there have been several studies regarding the temporal trends of  $\text{NO}_2$  columns over China including Foy et al. (2016) and Liu et al. (2016), their analysis did not show the discussion on the possible interactions between  $\text{NO}_2$  and  $\text{NH}_3$ .  $\text{NH}_3$  is the most abundant alkaline gas in the troposphere and is important for its ability to neutralize acidic components such as sulfuric acid ( $\text{H}_2\text{SO}_4$ ) and nitric acid ( $\text{HNO}_3$ ) which form, respectively, by the oxidation of emissions of sulfur dioxide ( $\text{SO}_2$ ) and nitrogen oxides ( $\text{NO}_x$ ). Reactions of  $\text{HNO}_3$  and  $\text{H}_2\text{SO}_4$  with  $\text{NH}_3$  generally form submicron ammonium nitrate ( $\text{NH}_4\text{NO}_3$ ) and ammoniated sulfate ( $\text{NH}_4\text{HSO}_4$ ,  $(\text{NH}_4)_2\text{SO}_4$ , or other forms) particles. High temperatures also promote dissociation of  $\text{NH}_4\text{NO}_3$  back to gaseous  $\text{NH}_3$  and  $\text{HNO}_3$ . Therefore, the temporal trends of  $\text{NH}_3$  and  $\text{NO}_2$  should have an interactive impact between each other.

An increase in  $\text{NH}_3$  columns in recent years may also be due to decreased  $\text{NH}_3$  removal leading to a larger fraction remaining in a gaseous state for a long time rather than changing to the condensed phase, which can be attributed to continuous decreased acidic gases over China including the  $\text{NO}_2$  and  $\text{SO}_2$  under strong control policy in 12-th FYP. This can largely decrease the fraction of the chemical conversion to  $(\text{NH}_4)_2\text{SO}_4$  and  $\text{NH}_4\text{NO}_3$  in the atmosphere (Paragraph 2 in Sect. 3.2.1).

In addition, we used different methods than Foy et al. (2016) and Liu et al. (2016). We adopted the method of Russel et al. (2012) (concentrating on the US in the original paper) to quantify the change of  $\text{NO}_2$  columns over China with focusing on the temporal analysis of warm months due to the relatively

low uncertainty compared to cold months.

Technical Comment:

(1) In determining the trend in NO<sub>2</sub>, the authors have calculated a linear fit to the monthly average data.

I find this approach to be problematic, since the trend seems to be influenced strongly by an increasing seasonal amplitude. In my opinion, the authors need to remove (or account for) the seasonality before calculating a long-term trend. Specifically, the winter monthly means seem to be driving most of the increase in their linear fit – but these values have the highest uncertainty (borne out by the larger magnitude of the error bars compared to summer months). Accounting for seasonality in determining trends in NO<sub>2</sub> is common practice. This can be accomplished, for example, by fitting the seasonal amplitude separately (e.g. Lamsal et al. (2015)), or by calculating trends in seasonal averages (e.g. Russel et al. (2012)).

Here, we respond to the Technical Comment before other major comments.

We agree with the reviewer that considering seasonality in determining trends of NO<sub>2</sub> is important. We have carefully reviewed all the given references including Foy et al. (2016) and Liu et al. (2016) in Major comments (1) as well as the given references of Lamsal et al. (2015) and Russell et al. (2012) in the Technical Comment.

We adopted the method of Russel et al. (2012) as suggested by the reviewer. In this method, averages were computed for both cold months (October-March) and warm months (April-September). We concentrated more on the temporal analysis of warm months due to the relatively low uncertainty compared to cold months. We have added related explanations and introduction text at Paragraph 1 in Sect. 3.2.1.

(a) OMI NO<sub>2</sub> at 13:45 P.M.

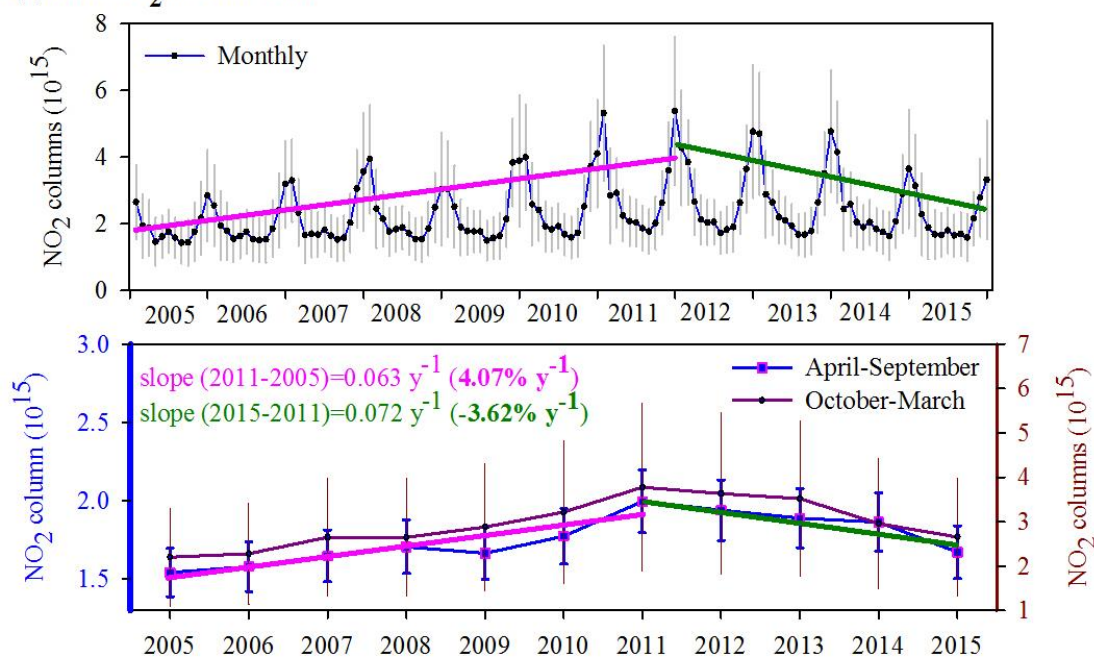

(b) IASI NH<sub>3</sub> at 9:30 A.M.

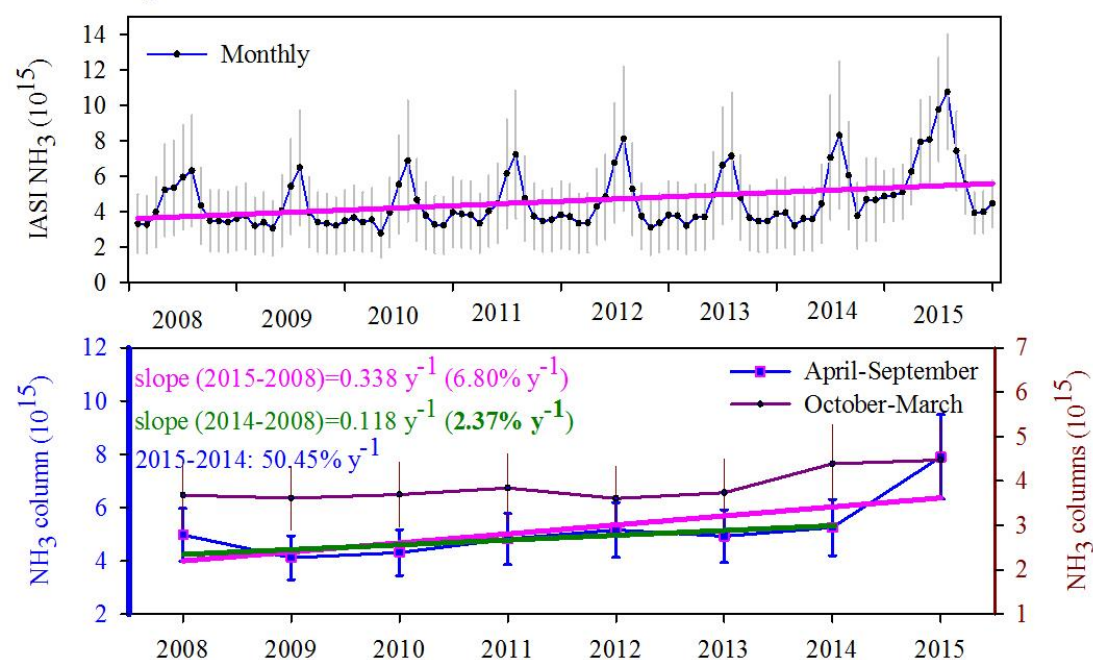

**Fig. 3.** Time series of average OMI NO<sub>2</sub> and IASI NH<sub>3</sub> columns over China during warm months (April-September) and cold months (October-March). The time period of NO<sub>2</sub> columns was from 2005 to 2015, while the timespan of NH<sub>3</sub> columns was from 2008 to 2015 over China. The associated mean error for each period is presented here as error bars.

(2) The inclusion of model results has added very little insight to the analysis. The MOZART model is driven by the EDGAR emissions to begin with (which are discussed in more detail separately). For

both NO<sub>2</sub> and NH<sub>3</sub>, I would expect the relationship between emissions and tropospheric columns to be pretty strong, so it's not clear what is expected to be learned by comparing trends in EDGAR emissions with trends in model output based on EDGAR emissions. Moreover, there is no analysis or discussion of the NO<sub>2</sub> model output at all, so why has this output been included in the figures? The authors must expand on or address why the model output has been included, and demonstrate clearly what insight is gained.

Satellite NO<sub>2</sub> and NH<sub>3</sub> columns were observed at overpass time as an instantaneous point in a day (at 9:30 A.M. for IASI NH<sub>3</sub> and at 1:45 P.M. for OMI NO<sub>2</sub> local time). These instantaneous satellite observations may not be representative for the temporal trend analysis over China (refer to Paragraph 1 in Sect. 3.3). We calculated the monthly mean NO<sub>2</sub> and NH<sub>3</sub> columns from MOZART varying 6 hours every day (00, 06, 12, 18 h) in order to: (1) calculate the temporal trend of mean NO<sub>2</sub> and NH<sub>3</sub> columns (averaged at 00, 06, 12, 18 h) rather than the instantaneous values; (2) compare the temporal trend analysis of NO<sub>2</sub> from MOZART at 12 h with that gained from satellite at the overpass time (OMI 1:45 P.M. local time) as well as for NH<sub>3</sub>.

In general, we found an agreement on the NO<sub>2</sub> temporal trend between MOZART (12:00) and OMI (13:45), while we found a lower increase rate from MOZART (12:00) than from IASI (9.30 A.M.). We have expanded the analysis and discussion of the NO<sub>2</sub> as well as NH<sub>3</sub> from MOZART at Paragraph 2 and 3 in Sect. 3.3. Please refer to them.

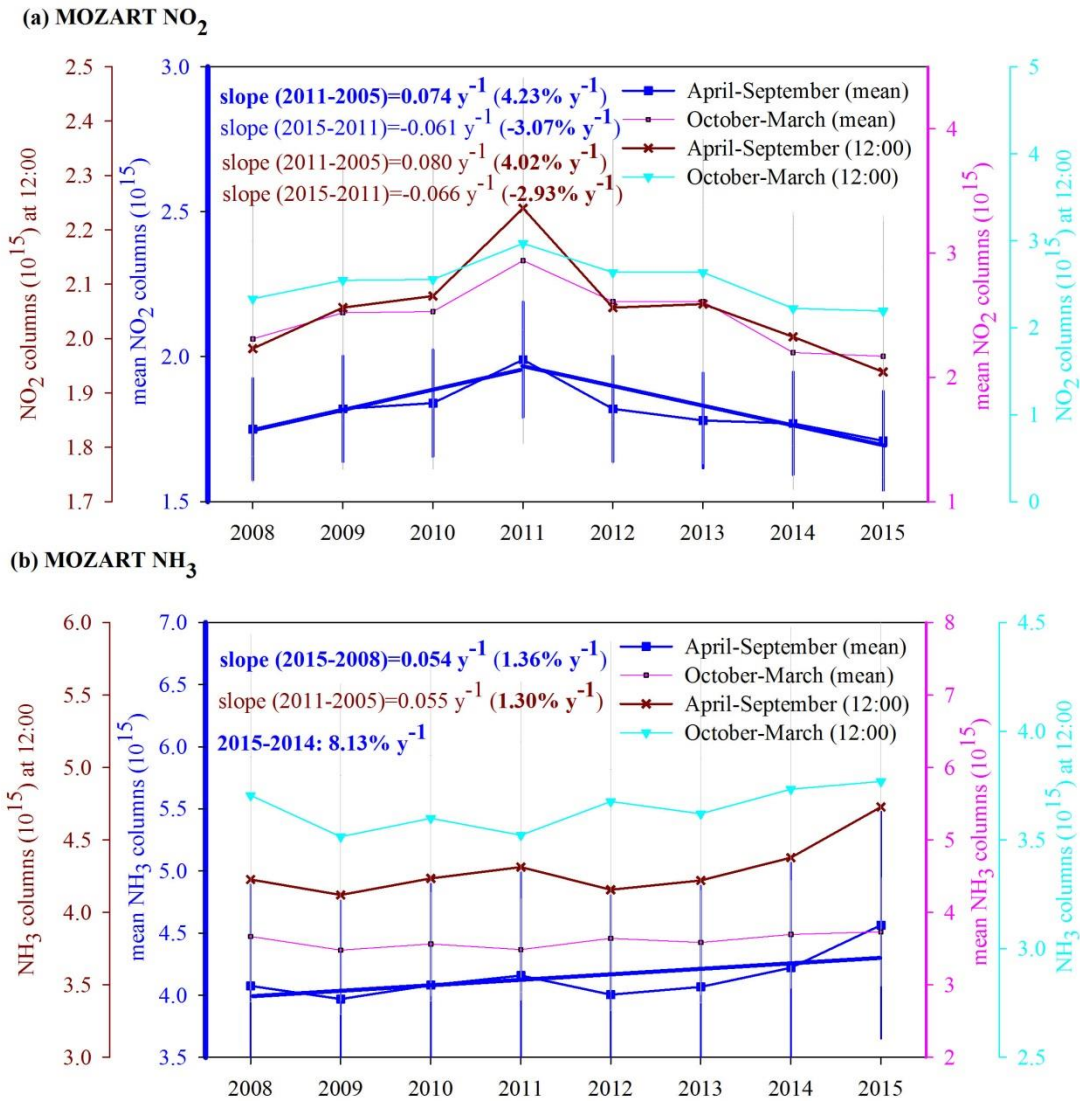

**Fig. 5.** Time series of MOZART NO<sub>2</sub> and NH<sub>3</sub> columns over China during average warm months (April-September) and cold months (October-March) from 2008 to 2015. The mean columns were calculated by averaging the columns at 00, 6, 12 and 18 h. The associated mean error for each period is presented here as error bar.

(3) The authors conclude the discussion section with implications for estimating long term reactive nitrogen deposition. The discussion about uncertainty and challenges in estimating dry and wet deposition seems to be out of place in this manuscript. Of course, there is an obvious connection between emissions, atmospheric abundance, and deposition - but this manuscript does not bring up the question of deposition until this final section, so it appears as a digression. While I agree with the conclusion made by the authors (that more long-term data sets are needed), I feel their discussion has not presented any new concepts based specifically on the results presented in this manuscript. The

connection between their analysis and insight into nitrogen deposition should be made stronger throughout the manuscript. Specifically, what has been gained from the analysis?

We agree with you that the connection between the trend analysis and insight into nitrogen deposition should be made stronger. The current paper describes the temporal characteristics of atmospheric  $\text{NH}_3$  and  $\text{NO}_2$  over China based on multiple datasets including emission data, satellite observations and atmospheric transport modeling results since 1980. We believe the multiple datasets used in the current work have implications for estimating long-term reactive nitrogen (Nr) deposition datasets, and Sect. 3.4 describes this point and the future work will be done soon. We have changed the title from "3.4. Implications for estimating long-term Nr deposition datasets" to "3.4. Implications for estimating long-term Nr deposition datasets and recommendations for future work". To make this point more clear, we have added the following text for more clarification:

"Satellite observation provides a new perspective for estimating Nr depositions regionally. For example, to improve the modeling performance in dry gaseous  $\text{NO}_2$  depositions from GEOS-Chem (Goddard Earth Observing System chemical transport model), Nowlan et al. (2014) applied the OMI  $\text{NO}_2$  columns to calibrate the simulated ground  $\text{NO}_2$  concentrations, and then estimated the deposition between 2005 and 2007. Our previous work focusing on the dry particulate  $\text{NO}_3^-$  deposition over China was also based on the OMI  $\text{NO}_2$  columns, MOZART simulations and monitored-based sources (Liu et al., 2017b). Geddes et al. (2017) also used the satellite  $\text{NO}_2$  columns from GOME, GOME-2 and SCIAMACHY instruments to calibrate the  $\text{NO}_x$  emissions in GEOS-Chem to estimate the  $\text{NO}_x$  depositions since 1996. The simulations combining the satellite measurements and CTM model to derive Nr depositions (Geddes and Martin, 2017; Nowlan et al., 2014) in recent years will provide relatively accurate datasets (certainly need to be validated and modified by ground measurements)."

"Despite progress in satellite techniques in recent decades (for  $\text{NO}_2$  since 1997 by GOME and for  $\text{NH}_3$  since 2008 by IASI), we can hardly track studies concerning Nr depositions before 1997 based on satellite observations. Thus, with the help of emissions data such as REAS and EDGAR, we can derive long-term Nr depositions, especially before 1997. Long-term emissions data such as REAS and EDGAR will also provide a valuable dataset to expand the modeling Nr depositions in recent years. In order to derive the Nr depositions from the emission data, the atmospheric chemistry transport models (CTMs) are frequently used through modeling the wet (simplified as the product of scavenging efficiency and precipitation amount) and dry processes (simplified as the inferential method by multiplying the deposition velocity and gaseous or particulate concentrations). However, we still lack a comprehensive dataset of gridded long-term Nr depositions including both the dry ( $\text{NO}_2$ ,  $\text{HNO}_3$ , particulate  $\text{NO}_3^-$ ,  $\text{NH}_3$  and particulate  $\text{NH}_4^+$ ) and wet ( $\text{NH}_4^+$  and  $\text{NO}_3^-$  in precipitation) processes over China, which will be addressed in future work".

"Another gap is that, all the above mentioned studies focused on the  $\text{NO}_x$  depositions and did not derive the  $\text{NH}_y$  ( $\text{NH}_3$  plus  $\text{NH}_4^+$ ) depositions over China. Our recent work (Liu et al., 2017a) using IASI  $\text{NH}_3$  columns combining the vertical profiles from MOZART benefits our understanding of the ground  $\text{NH}_3$  concentrations over China, and the satellite-derived ground  $\text{NH}_3$  concentrations were generally in accord with the national measurements from NNDMN. To date, there are still no reports of using the satellite  $\text{NH}_3$  columns to derive the temporal and regional  $\text{NH}_y$  depositions over China, which dominated the total Nr depositions ( $\text{NO}_x$  plus  $\text{NH}_y$ ) (Liu et al., 2016; Liu et al., 2013). The gaps of modeling  $\text{NH}_y$  depositions by applying the satellite observations combining the CTMs simulations require more efforts and further research".

We herein list some important works regarding Nr depositions using satellite, CTMs and emissions as



well as cited them in the main text:

(1) Liu, L., Zhang, X., Zhang, Y., Xu, W., Liu, X., Zhang, X., Feng, J., Chen, X., Zhang, Y., Lu, X., Wang, S., Zhang, W., and Zhao, L.: Dry Particulate Nitrate Deposition in China, *Environmental Science & Technology*, 10.1021/acs.est.7b00898, 2017. **Our recent work focused on the dry  $\text{NO}_3^-$  deposition based on OMI  $\text{NO}_2$ , MOZART simulations and monitor-based sources.**

(2) Liu, L., Zhang, X., Xu, W., Liu, X., Lu, X., Wang, S., Zhang, W., and Zhao, L.: Ground Ammonia Concentrations over China Derived from Satellite and Atmospheric Transport Modeling, *Remote Sensing*, 9, 467, 2017. **Our recent work focused on ground  $\text{NH}_3$  concentrations based on IASI  $\text{NH}_3$  and MOZART simulations, and we can gain dry  $\text{NH}_3$  depositions combining the deposition velocity.**

(3) Zhang, X., Lu, X., Liu, L., Chen, D., Zhang, X., Liu, X., Zhang, Y.: Dry gaseous  $\text{NO}_2$  deposition inferred from Ozone Monitoring Instrument  $\text{NO}_2$  columns and atmospheric chemistry transport model over China, *Journal of Geophysical Research-Atmosphere*, 2017 (submitted). **Our recent work focused on the gaseous  $\text{NO}_2$  depositions based on OMI  $\text{NO}_2$  and MOZART simulations.**

(4) Geddes, J. A., and Martin, R. V.: Global deposition of total reactive nitrogen oxides from 1996 to 2014 constrained with satellite observations of  $\text{NO}_2$  columns, *Atmos. Chem. Phys. Discuss.*, 2017, 1-44, 10.5194/acp-2016-1100, 2017. **Geddes's recent work focused on the total  $\text{NO}_x$  depositions globally based on the GOME, GOME-2 and SCIAMACHY  $\text{NO}_2$  and GEOS-Chem.**

(5) Nowlan, C., Martin, R., Philip, S., Lamsal, L., Krotkov, N., Marais, E., Wang, S., and Zhang, Q.: Global dry deposition of nitrogen dioxide and sulfur dioxide inferred from space - based measurements, *Global Biogeochemical Cycles*, 28, 1025-1043, 2014. **Nowlan's previous work focused on the gaseous  $\text{NO}_2$  depositions globally based on the OMI  $\text{NO}_2$  and GEOS-Chem.**

Specific comments:

line 88: The authors use of the term "widely" warrants more than two examples in the citation.

We added 4 new references in this line: Castellanos et al., 2015, Lamsal et al., 2015, Liu et al., 2016 and Foy et al., 2016.

line 110: "is believed to have the highest spatial resolution". Surely this statement can be confirmed instead of believed.

We have changed "is believed to have the highest spatial resolution" to "has the highest spatial resolution".

line 117: I suggest the authors replace the expression "multivariate", since this term usually implies something different (i.e. modeling). May I suggest the authors use "multiple datasets" throughout the manuscript, instead of "multivariate".

We have changed "multivariate data" to "multiple datasets" throughout the manuscript.

lines 151-153: Repeating the thresholds for error consideration is redundant here.

We have removed the repetition in these lines.

line 202: Please also include the spatial resolution of the model simulation.

We have added it as suggested.

line 223: "their thread values both positive". Please clarify this sentence.

We have changed "their thread values both positive" to "their thread values of  $0.24 \text{ kg N ha}^{-1} \text{ y}^{-2}$  (EDGAR) vs  $0.17 \text{ kg N ha}^{-1} \text{ y}^{-2}$  (REAS) both reflected a continuous increasing trend (in this regard they are consistent)".

line 232-233: I think the closer agreement with one other estimate does not necessarily mean the EDGAR estimate is "more reasonable". Please qualify.

The original discussion in line 232-233 was logically wrong, and we are now aware of that. Reviewer 2 also commented, "the authors thought  $0.24 \text{ kg N ha}^{-1} \text{ y}^{-2}$  from EDGAR was much higher than  $0.17 \text{ kg N ha}^{-1} \text{ y}^{-2}$  from REAS in lines 221-222 of page 11. However, they thought  $0.33 \text{ kg N ha}^{-1} \text{ y}^{-2}$  was close to  $0.24 \text{ kg N ha}^{-1} \text{ y}^{-2}$  in lines 231-232 of the same page. This is logically wrong. They need to correct it and also the relevant discussions."

In this revision, we have rewritten the sentences as the following text in the third paragraph in Sect. 3.1:

"A previous study (Liu et al., 2013) summarized published data on the national anthropogenic  $\text{NH}_3$  and  $\text{NO}_x$  emissions with multi-periods in China (Wang et al., 2009; Wang et al., 1997; Streets et al., 2003; Klimont et al., 2001; Sun and Wang, 1997; Olivier et al., 1998; FRCGC, 2007), and also analyzed the temporal pattern of  $\text{NH}_3$  emissions. Their results showed that the  $\text{NH}_3$  emissions had increased at an annual average rate of  $0.32 \text{ Tg N y}^{-2}$  (about  $0.33 \text{ kg N ha}^{-1} \text{ y}^{-2}$ ). The increase rate of  $\text{NH}_3$  emissions ( $0.33 \text{ kg N ha}^{-1} \text{ y}^{-2}$ ) by Liu et al. (2013) was double that in REAS ( $0.17 \text{ kg N ha}^{-1} \text{ y}^{-2}$ ), implying that the  $\text{NH}_3$  increase rate in China is still an open question, and should be further studied in future work."

line 255 (and elsewhere): The use of the expression "no big changes" does not have much scientific meaning. May I suggest "no significant changes" followed by the results of some statistical test?

We have changed "no big changes" to " $0.118 \times 10^{15} \text{ molec. cm}^{-2} \text{ y}^{-1}$  ( $2.37\% \text{ y}^{-1}$ ) in warm months".

line 256: The slope in  $\text{NH}_3$  of  $0.025 \times 10^{15}$  is actually twice the slope of  $\text{NO}_2$  ( $0.011 \times 10^{15}$ ), so can the authors clarify why the slope in  $\text{NH}_3$  is not determined to be important or large? Should they clarify that they are speaking in relative terms to the atmospheric concentrations? What are the trends in %/year for  $\text{NO}_2$  compared to  $\text{NH}_3$ ?

Yes, we refer to the percent increase rate rather than the absolute increase rate. We have added the

following text for explanations as well as the percent increase rate ( $\% \text{ y}^{-1}$ ) by the following text:

"The percent increase rate for  $\text{NH}_3$  by year ( $2.37\% \text{ y}^{-1}$ ) from 2008 to 2014 is lower than that for  $\text{NO}_2$  ( $4.07\% \text{ y}^{-1}$ ) from 2005 to 2011, although the absolute  $\text{NH}_3$  increase rate of  $0.118 \times 10^{15} \text{ molec. cm}^{-2} \text{ y}^{-1}$  from 2008 to 2014 was higher than that of  $0.063 \times 10^{15} \text{ molec. cm}^{-2} \text{ y}^{-1}$  for  $\text{NO}_2$  from 2005 to 2011."

line 305-306: Can the author confirm these numbers are coming from the reference in the preceding sentence (Wang et al. 2012)?

No, these numbers come from the reference (Xia et al., 2016), and we have added the reference.

line 311: Can the authors explain why it would be better to calculate trends based on daily data? This would be unusual.

This sentence has been rewritten and clarified by the following text:

"It is difficult to gain whole coverage based on the daily data over China for both IASI  $\text{NH}_3$  and OMI  $\text{NO}_2$ . For daily  $\text{NO}_2$ , the spatial coverage gained by OMI were influenced by cloud radiance fractions, surface albedo, solar zenith angles, row anomaly and so on (Russell et al., 2011; De Smedt et al., 2015).

"row anomaly" issue resulting from the OMI instrumental problem had an impact on approximately half of the rows undergoing unpredictable patterns in cross-track directions relying on latitudes and seasons and prevented obtaining convincing daily product with continuous coverage (Boersma et al., 2011; Boersma et al., 2016)."

line 350, 351, and 353: Are the authors referring to the panels in Figure 6, not Figure 5?

Yes, we have changed it.

line 359: "...this is the conclusion we really concerned." Please clarify this sentence.

We referred to the sentence "At the current state, we can, at least, draw a conclusion that the  $\text{NH}_3$  columns over China indeed increased in 2015 both from IASI and MOZART, but a debate or

inconsistency exists on the increase rate of the NH<sub>3</sub> columns in 2015". We have marked this sentence in red and removed "this is the conclusion we really concerned".

line 360: "... the following discussion in this paragraph was all hypothetical". Are the authors referring to the next two sentences? This isn't much of a discussion.

Yes, we refer to the sentence: "For IASI NH<sub>3</sub> columns, the sharp increase in 2015 over China may be an artifact, which may be due to an update of the input data."

line 373: "in high level". I suggest replacing this expression with something more clear.

We have changed "in high level" to "in high level with an average of 1.87 molec. cm<sup>-2</sup> y<sup>-1</sup> compared with that (1.65 molec. cm<sup>-2</sup> y<sup>-1</sup>) during 2005-2010".

line 401: "no big variations". Again, I suggest replacing this statement with something more scientifically/statistically clear.

We have changed "no big variations" to "the percent increase rate of 2.37% y<sup>-1</sup>".

#### References:

de Foy et al. (2016), Scientific Reports, <http://dx.doi.org/10.1038/srep35912>

Liu et al. (2016), Environmental Research Letters, <http://dx.doi.org/10.1088/1748-9326/11/11/114002>

Lamsal et al. (2015), Atmospheric Environment, <http://dx.doi.org/10.1016/j.atmosenv.2015.03.055>

Russell et al. (2012), Atmospheric Chemistry and Physics,

<http://dx.doi.org/10.5194/acp-12-12197-2012>

We have reviewed and added all the suggested references.

#### **Other corrections**

Removed original Fig. 6.

Since the information on the increase rate (%) between 2014 and 2015 from MOZART and IASI has

been added in Fig. 3 and Fig. 5 in this revision, we have removed original Fig. 6 to avoid duplication.

## References

Boersma, K. F., Eskes, H. J., Dirksen, R. J., van der A, R. J., Veeffkind, J. P., Stammes, P., Huijnen, V., Kleipool, Q. L., Sneep, M., Claas, J., Leitão, J., Richter, A., Zhou, Y., and Brunner, D.: An improved tropospheric NO<sub>2</sub> column retrieval algorithm for the Ozone Monitoring Instrument, *Atmospheric Measurement Techniques*, 4, 1905-1928, 10.5194/amt-4-1905-2011, 2011.

Boersma, K. F., Vinken, G. C. M., and Eskes, H. J.: Representativeness errors in comparing chemistry transport and chemistry climate models with satellite UV–Vis tropospheric column retrievals, *Geosci. Model Dev.*, 9, 875-898, 10.5194/gmd-9-875-2016, 2016.

De Smedt, I., Stavrou, T., Hendrick, F., Danckaert, T., Vlemmix, T., Pinaridi, G., Theys, N., Lerot, C., Gielen, C., and Vigouroux, C.: Diurnal, seasonal and long-term variations of global formaldehyde columns inferred from combined OMI and GOME-2 observations, *Atmospheric Chemistry & Physics*, 15, 12241-12300, 2015.

Regional Emission Inventory in Asia: <http://www.jamstec.go.jp/frsgc/research/d4/emission.htm>, 2007.

Geddes, J. A., and Martin, R. V.: Global deposition of total reactive nitrogen oxides from 1996 to 2014 constrained with satellite observations of NO<sub>2</sub> columns, *Atmos. Chem. Phys. Discuss.*, 2017, 1-44, 10.5194/acp-2016-1100, 2017.

Klimont, Z., Cofala, J., Schöpp, W., Amann, M., Streets, D. G., Ichikawa, Y., and Fujita, S.: Projections of SO<sub>2</sub>, NO<sub>x</sub>, NH<sub>3</sub> and VOC Emissions in East Asia Up to 2030, *Water, Air, & Soil Pollution*, 130, 193-198, 2001.

Liu, L., Zhang, X., Wang, S., Lu, X., and Ouyang, X.: A Review of Spatial Variation of Inorganic Nitrogen (N) Wet Deposition in China, *PLoS one*, 11, e0146051, 2016.

Liu, L., Zhang, X., Xu, W., Liu, X., Lu, X., Wang, S., Zhang, W., and Zhao, L.: Ground Ammonia Concentrations over China Derived from Satellite and Atmospheric Transport Modeling, *Remote Sensing*, 9, 467, 2017a.

Liu, L., Zhang, X., Zhang, Y., Xu, W., Liu, X., Zhang, X., Feng, J., Chen, X., Zhang, Y., Lu, X., Wang, S., Zhang, W., and Zhao, L.: Dry Particulate Nitrate Deposition in China, *Environmental Science & Technology*, 10.1021/acs.est.7b00898, 2017b.

Liu, X., Zhang, Y., Han, W., Tang, A., Shen, J., Cui, Z., Vitousek, P., Erisman, J. W., Goulding, K., and Christie, P.: Enhanced nitrogen deposition over China, *Nature*, 494, 459-462, 2013.

Nowlan, C., Martin, R., Philip, S., Lamsal, L., Krotkov, N., Marais, E., Wang, S., and Zhang, Q.: Global dry deposition of nitrogen dioxide and sulfur dioxide inferred from space - based measurements, *Global Biogeochemical Cycles*, 28, 1025-1043, 2014.

Olivier, J. G. J., Bouwman, A. F., Hoek, K. W. V. D., and Berdowski, J. J. M.: Global air emission inventories for anthropogenic sources of  $\text{NO}_x$ ,  $\text{NH}_3$  and  $\text{N}_2\text{O}$  in 1990, *Environmental Pollution*, 102, 135-148, 1998.

Russell, A. R., Perring, A. E., Valin, L. C., and Bucseka, E. J.: A high spatial resolution retrieval of  $\text{NO}_2$  column densities from OMI: method and evaluation, *Atmospheric Chemistry & Physics*, 11, 12411-12440, 2011.

Streets, D. G., Bond, T. C., Carmichael, G. R., Fernandes, S. D., He, D., Klimont, Z., Nelson, S. M., Tsai, N. Y., and Wang, M. Q.: An inventory of gaseous and primary aerosol emissions in Asia in the year 2000, *Journal of Geophysical Research Atmospheres*, 108, GTE 30-31, 2003.

Sun, Q., and Wang, M.: Ammonia Emission and Concentration in the Atmosphere over China, *Scientia Atmospherica Sinica*, 1997.

Wang, S. W., Liao, J. H., Yu-Ting, H. U., and Yan, X. Y.: A Preliminary Inventory of NH<sub>3</sub>-N Emission and Its Temporal and Spatial Distribution of China, *Journal of Agro-Environment Science*, 2009.

Wang, W. X., Lu, X. F., Pang, Y. B., Tang, D. G., and Zhang, W. H.: Geographical distribution of NH<sub>3</sub> emission intensities in China, *Actaentiae Circumstantiae*, 1997.

Xia, Y., Zhao, Y., and Nielsen, C. P.: Benefits of China's efforts in gaseous pollutant control indicated by the bottom-up emissions and satellite observations 2000–2014, *Atmospheric Environment*, 136, 43-53, <http://dx.doi.org/10.1016/j.atmosenv.2016.04.013>, 2016.
