# Supplementary material for: Temporal characteristics of atmospheric ammonia and nitrogen dioxide over China based on emission data, satellite observations and atmospheric transport modeling since 1980
Source: Copernicus journal article supplement (doi:10.5194/acp-2017-106), 2017-03-21
Supplement: Supplementary file [file acp-2017-106-AC3-supplement.pdf]

## Referee #2

We are grateful to the reviewer for the time and energy in providing helpful comments and guidance that have improved the manuscript. In this document, we describe how we have addressed the reviewer's comments. Detailed responses to each comment are given below (in blue).

This manuscript showed interesting results on the temporal evolution of  $\text{NO}_x$  and  $\text{NH}_3$  over China. By comparing the data resulting from inventories of REAS and EDGAR, the authors found that  $\text{NH}_3$  and  $\text{NO}_x$  continually increased over China during 1980-2010. Furthermore, based on previous satellite observations and an atmospheric chemistry transport model (MOZART-4), they also found that  $\text{NO}_2$  over China increased from 2005 to 2011 and then decreased significantly from 2011 to 2015. Finally the authors discussed the plausible reasons including control policies of Chinese government to the emission trends of reactive nitrogen. Overall the topic of the study is sound and the manuscript was written well. However, I have the following concerns to be addressed before recommending it for publication in Atmos. Chem. Phys.

### Major comments:

1. In line 168 of page 8, the authors filtered the DOMINO product with an absolute error below  $10^{15}$  molecules  $\text{cm}^{-2}$ . However the  $\text{NO}_2$  vertical column densities (VCDs) error depend on the net values of  $\text{NO}_2$  VCDs. Therefore the filter may arbitrarily exclude the high  $\text{NO}_2$  VCD values. The authors should evaluate the influence of absolute errors on the final emission results and show it in current study.

We used the DOMINO  $\text{NO}_2$  product developed by Boersma et al. (2011). The fundamental algorithm of the retrieved  $\text{NO}_2$  columns are the residual of subtracting two large numbers (the total slant column, and stratospheric slant  $\text{NO}_2$  column). Because high  $\text{NO}_2$  columns with high absolute errors as well as negative (or zero)  $\text{NO}_2$  columns are statistically meaningful, they should not be discarded, as described

in the user manual (<http://www.temis>). In this revision, we did not filter the DOMINO product to perform the analysis.

2. The authors compared the emission data of NO<sub>2</sub> and NH<sub>3</sub> from satellite observations to that from Mozart-4 model simulations. But the authors did not explain whether the satellite overpass time has been considered during the comparison or not. The OMI satellite only gives the NO<sub>2</sub> data at about 1:30 pm of local time. The same time could also be used for the extraction of NO<sub>2</sub> data from Mozart-4 model. Whether this will influence the output results and conclusions of current study? This point should be clarified more.

Thank you very much for this good suggestion. In this revision, we have added the temporal trend analysis of NO<sub>2</sub> and NH<sub>3</sub> columns at 12:00 from MOZART to compare with that gained from satellite (OMI 1:45 P.M. local time) as shown in **Fig. 5, since the MOZART outputs vary over six hours** (00, 06, 12 and 18 h).

We gained very similar results between OMI NO<sub>2</sub> (13:45 P.M.) and MOZART NO<sub>2</sub> at 12:00 with an increase rate of 4.02% y<sup>-1</sup> vs 4.23% y<sup>-1</sup> before 2011 and a decrease rate of -2.93% y<sup>-1</sup> (OMI) vs -3.07% y<sup>-1</sup> (MOZART) between 2011 and 2015 (Fig. 5). In general, we found an agreement on the NO<sub>2</sub> temporal trend between MOZART (12:00) and OMI (13:45) (refer to **Paragraph 3 in Sect. 3.3**).

(a) MOZART NO<sub>2</sub>

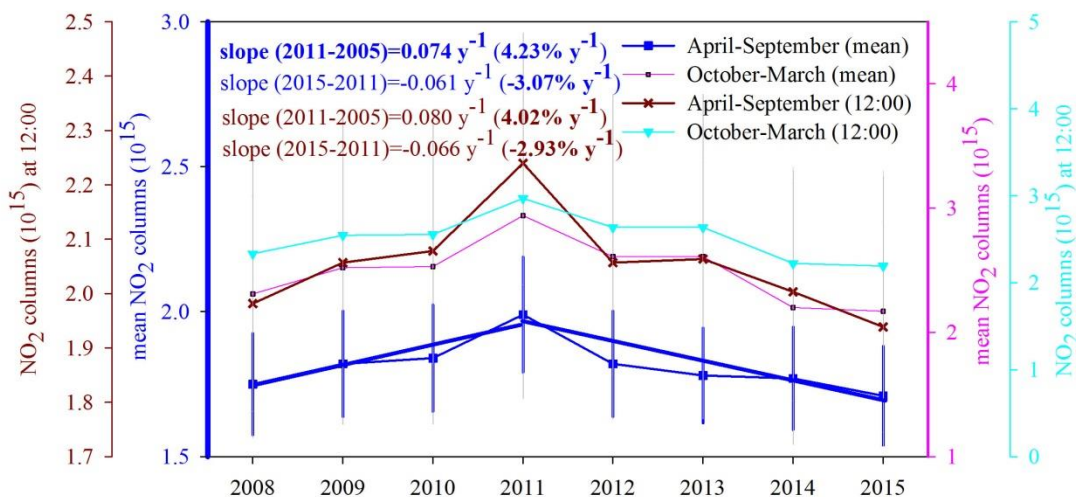

(b) MOZART NH<sub>3</sub>

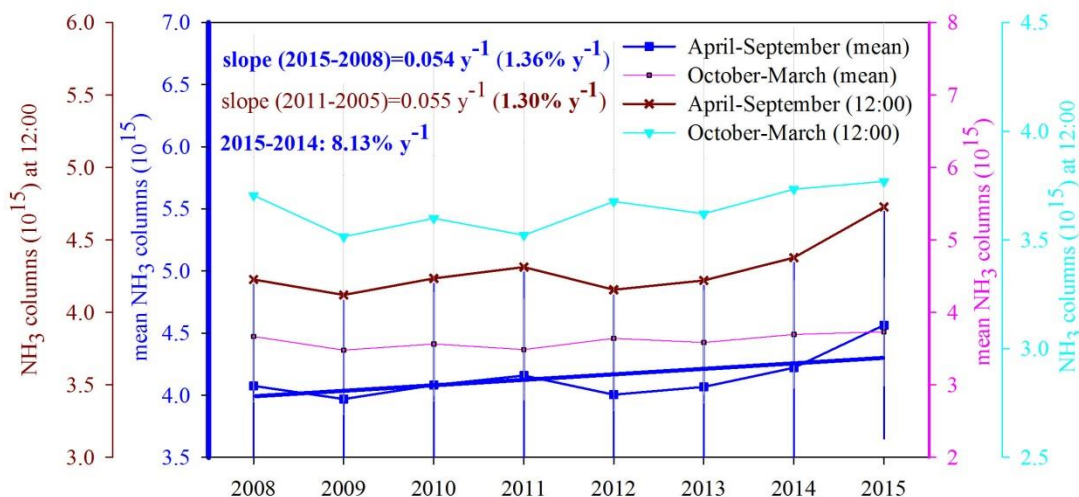

**Fig. 5.** Time series of MOZART NO<sub>2</sub> and NH<sub>3</sub> columns over China during average warm months (April-September) and cold months (October-March) from 2008 to 2015. The mean columns were calculated by averaging the columns at 00, 6, 12 and 18 h. The associated mean error for each period is presented here as error bars.

3. The MOZART-4 model contained 12 bulk aerosol compounds, 39 photolysis, 85 gas species as well as 157 gas-phase reactions. However, the authors did not discuss the influence of NO<sub>x</sub> and NH<sub>3</sub> sink on their emission values at all while elucidating the data from MOZART-4. Although the authors have discussed the potential impacts of emission regulation or energy efficiency enhancement relevant government control policies on the NO<sub>x</sub> and NH<sub>3</sub> emissions, they are encouraged to show their insight on the correlations of atmospheric process of NO<sub>x</sub> and NH<sub>3</sub> with their final emission values.

Thank you very much for this good suggestion. NH<sub>3</sub> is the most abundant alkaline gas in the

troposphere and is important for its ability to neutralize acidic components such as sulfuric acid ( $\text{H}_2\text{SO}_4$ ) and nitric acid ( $\text{HNO}_3$ ) which form, respectively, by oxidation of emissions of sulfur dioxide ( $\text{SO}_2$ ) and nitrogen oxides ( $\text{NO}_x$ ). Reactions of  $\text{HNO}_3$  and  $\text{H}_2\text{SO}_4$  with  $\text{NH}_3$  generally form submicron ammonium nitrate ( $\text{NH}_4\text{NO}_3$ ) and ammoniated sulfate ( $\text{NH}_4\text{HSO}_4$ ,  $(\text{NH}_4)_2\text{SO}_4$ , or other forms) particles. High temperatures also promote dissociation of  $\text{NH}_4\text{NO}_3$  back to gaseous  $\text{NH}_3$  and  $\text{HNO}_3$ . Therefore, the temporal trends of  $\text{NH}_3$  and  $\text{NO}_2$  should have an interactive impact between each other.

We have discussed the potential correlations of atmospheric process of  $\text{NO}_x$  and  $\text{NH}_3$  on the impact of the temporal trends in the following text added in **Paragraph 4 in Sect. 3.3** :

"In MOZART-4, the alkaline gaseous  $\text{NH}_3$  and the acidic gaseous  $\text{NO}_2$  (the precursor for  $\text{HNO}_3$ ) and  $\text{SO}_2$  are very important precursors for bulk  $\text{NH}_4\text{NO}_3$  and  $(\text{NH}_4)_2\text{SO}_4$  particles, which form the primary system of gas-particle partitioning ( $\text{NH}_3\text{-NH}_4^+\text{-NO}_x\text{-NO}_3^-\text{-SO}_2\text{-SO}_4^{2-}$ ). The chemical shifts between particulate  $\text{NH}_4\text{NO}_3$  and gaseous  $\text{NH}_3$  and  $\text{NO}_x$  are correlated with the abundance of  $\text{NH}_3$  and  $\text{NO}_x$  and meteorological factors. The decreased abundance of  $\text{NO}_x$  between 2011 and 2015 may also contribute to an increase in the  $\text{NH}_3$  abundance in the gas stage resulting from decreased conversion to particulate  $\text{NH}_4\text{NO}_3$ "

4. In section 3.1, the authors showed the emission data result from REAS and EDGAR, but they did not give convincing reasons for the different results of  $0.24 \text{ kg N ha}^{-1} \text{ y}^{-2}$  from EDGAR and  $0.17 \text{ kg N ha}^{-1} \text{ y}^{-2}$  from REAS. The authors should supply plausible explanations (e.g. induced by methodological difference of data compiling or meteorological factors etc.) to this. In addition, the authors thought  $0.24 \text{ kg N ha}^{-1} \text{ y}^{-2}$  from EDGAR was much higher than  $0.17 \text{ kg N ha}^{-1} \text{ y}^{-2}$  from REAS in lines 221-222 of page 11. However, they thought  $0.33 \text{ kg N ha}^{-1} \text{ y}^{-2}$  was close to  $0.24 \text{ kg N ha}^{-1} \text{ y}^{-2}$  in lines 231-232 of the same page. This is logically wrong. They need to correct it and also the relevant discussions.

We have added the possible reasons for the discrepancy between REAS and EDGAR as the following text in Sect. 3.1:

"The discrepancy in the magnitude of  $\text{NH}_3$  increase rate from REAS and EDGAR ( $0.24 \text{ kg N ha}^{-1} \text{ y}^{-2}$  vs  $0.17 \text{ kg N ha}^{-1} \text{ y}^{-2}$ ) in China since 1980 may come from the different emission factors considered for estimating  $\text{NH}_3$  emissions. The EDGAR v4.3.1  $\text{NH}_3$  emissions were calculated based on sectors of agriculture, shipping, waste solid and wastewater, energy for buildings, process emissions during production and application, power industry, oil refineries, transformation industry, combustion for manufacturing, road transportation, railways, pipelines and off-road transport, while the REAS v1.1  $\text{NH}_3$  emissions focused mostly on the agriculture source (i.e., manure management of livestock and fertilizer application) (Crippa et al., 2015; Ohara et al., 2007). Moreover, the fundamental methodology of estimating the REAS v1.1  $\text{NH}_3$  emissions did not consider the seasonal agricultural variations compared with that of EDGAR v4.3.1  $\text{NH}_3$  emissions (Kurokawa et al., 2013), and the removal efficiency (as a key element used to estimate  $\text{NH}_3$  emissions) in REAS v1.1 was also reported to be much higher than that in EDGAR v4.3.1 (Kurokawa et al., 2013)."

In addition, we have rewritten the sentences, which were logically wrong as the reviewer pointed out, by the following text at **Paragraph 3 in Sect. 3.1**:

"A previous study (Liu et al., 2013) summarized published data on the national anthropogenic  $\text{NH}_3$  and  $\text{NO}_x$  emissions with multi-periods in China (Wang et al., 2009; Wang et al., 1997; Streets et al., 2003; Klimont et al., 2001; Sun and Wang, 1997; Olivier et al., 1998; FRCGC, 2007), and also analyzed the temporal pattern of  $\text{NH}_3$  emissions. Their results showed that the  $\text{NH}_3$  emissions had increased at an annual average rate of  $0.32 \text{ Tg N y}^{-2}$  (about  $0.33 \text{ kg N ha}^{-1} \text{ y}^{-2}$ ). The increase rate of  $\text{NH}_3$  emissions ( $0.33 \text{ kg N ha}^{-1} \text{ y}^{-2}$ ) by Liu et al. (2013) was double that in REAS ( $0.17 \text{ kg N ha}^{-1} \text{ y}^{-2}$ ), implying the

NH<sub>3</sub> increase rate in China is still an open question, and should be further studied ".

5. In lines 311-315 of page 15, the whole daily coverage over China cannot be achieved also due to the row anomaly effect. This effect may cause half of the satellite pixels to be unusable. The discussions here should be rearranged.

Thank you very much for this good suggestion. We have added the description of row anomaly effect and rearranged this discussion by the following text:

"For daily NO<sub>2</sub>, the spatial coverage gained by OMI were influenced by cloud radiance fractions, surface albedo, solar zenith angles, row anomaly and so on (Russell et al., 2011;De Smedt et al., 2015).

"Row anomaly" issue resulting from the OMI instrumental problem had an impact on approximately half of the rows undergoing unpredictable patterns in cross-track directions relying on latitudes and seasons and prevented obtaining convincing daily product with continuous coverage (Boersma et al., 2011;Boersma et al., 2016).".

6. Lines 99-101: the authors are encouraged to expand introduction on the method for converting satellite data to NH<sub>3</sub> column. Only a reference citation is not convenient for readers to follow up the work in a straight way.

We have expanded the introduction on the method of converting satellite data to NH<sub>3</sub> column by adding the following text:

"The retrieval algorithm of obtaining the IASI NH<sub>3</sub> total columns was based on the method in Whitburn et al. (2016). Two main steps were performed to derive the NH<sub>3</sub> columns from the satellite observations. First, deriving the spectral hyperspectral range index (HRI) based on each IASI observations (Walker et al., 2011;Van Damme et al., 2014). Second, converting HRI to NH<sub>3</sub> columns based on a constructed neural network with input parameters including vertical NH<sub>3</sub> profile, satellite

viewing angle, surface temperature and so on (Whitburn et al., 2016)".

**Minor comments:**

7. Line 102: the words of 'provides' and 'potential' should be changed to 'provide' and 'possibility'.

We have changed it as suggested.

8. Line 104: the description of 'emission data are also very important tools' is confusing, and there is no logic comparability with 'satellite observations' in the front dialogue, so I suggest to remove the 'tools' or modify the front dialogue properly.

We have removed the "tools".

9. Line 110: change 'resolutions' to 'resolution'.

We have changed it as suggested.

10. Line 170: change 'the manuscript' to 'previous work'.

We have changed it as suggested.

11. Line 130: change 'denotes' to 'denote'.

We have changed it as suggested.

12. Line 228-29: Similar information of the first dialogue here has been shown in lines 221-222, so there is no necessary to show it twice.

We have removed Line 228-229 to avoid repetition.

13. Line 229-230: the description of 'Liu et al. (2013) conducted that emissions of national anthropogenic NH<sub>3</sub> and NO<sub>x</sub> summarized from published data during 1980-2010' is confusing and should be rearranged.

We have rewritten these sentences by the following text:

"A previous study (Liu et al., 2013) summarized published data on the national anthropogenic NH<sub>3</sub> and

NO<sub>x</sub> emissions with multi-periods in China (Wang et al., 2009; Wang et al., 1997; Streets et al., 2003; Klimont et al., 2001; Sun and Wang, 1997; Olivier et al., 1998; FRCGC, 2007), and also analyzed the temporal pattern of NH<sub>3</sub> emissions. Their results showed that the NH<sub>3</sub> emissions had increased at an annual average rate of 0.32 Tg N y<sup>-2</sup> (about 0.33 kg N ha<sup>-1</sup> y<sup>-2</sup>). The increase rate of NH<sub>3</sub> emissions (0.33 kg N ha<sup>-1</sup> y<sup>-2</sup>) by Liu et al. (2013) was double that in REAS (0.17 kg N ha<sup>-1</sup> y<sup>-2</sup>), implying that the NH<sub>3</sub> increase rate in China is still an open question, and should be further studied in future work."

14. Figure 1: add error bars to panel b please

Figure 1 shows a descriptive statistic of observation numbers by year, and we do not have error bars.

#### **Other corrections**

Removed original Fig. 6.

Since the information on the increase rate (%) between 2014 and 2015 from MOZART and IASI has been added in Fig. 3 and Fig. 5 in this revision, we have removed the original Fig. 6 to avoid duplication.

#### **References**

Boersma, K. F., Eskes, H. J., Dirksen, R. J., van der A, R. J., Veefkind, J. P., Stammes, P., Huijnen, V., Kleipool, Q. L., Sneep, M., Claas, J., Leitão, J., Richter, A., Zhou, Y., and Brunner, D.: An improved tropospheric NO<sub>2</sub> column retrieval algorithm for the Ozone Monitoring Instrument, *Atmospheric Measurement Techniques*, 4, 1905-1928, 10.5194/amt-4-1905-2011, 2011.

Boersma, K. F., Vinken, G. C. M., and Eskes, H. J.: Representativeness errors in comparing chemistry transport and chemistry climate models with satellite UV-Vis tropospheric column retrievals, *Geosci. Model Dev.*, 9, 875-898, 10.5194/gmd-9-875-2016, 2016.

Crippa, M., Janssensmaenhout, G., Dentener, F., Guizzardi, D., Sindelarova, K., Muntean, M., Van



Dingenen, R., and Granier, C.: Forty years of improvements in European air quality: the role of EU policy-industry interplay, *Atmospheric Chemistry & Physics*, 15, 322-337, 2015.

De Smedt, I., Stavrou, T., Hendrick, F., Danckaert, T., Vlemmix, T., Pinardi, G., Theys, N., Lerot, C., Gielen, C., and Vigouroux, C.: Diurnal, seasonal and long-term variations of global formaldehyde columns inferred from combined OMI and GOME-2 observations, *Atmospheric Chemistry & Physics*, 15, 12241-12300, 2015.

Regional Emission Inventory in Asia: <http://www.jamstec.go.jp/frsgc/research/d4/emission.htm>, 2007.

Klimont, Z., Cofala, J., Schöpp, W., Amann, M., Streets, D. G., Ichikawa, Y., and Fujita, S.: Projections of SO<sub>2</sub>, NO<sub>x</sub>, NH<sub>3</sub> and VOC Emissions in East Asia Up to 2030, *Water, Air, & Soil Pollution*, 130, 193-198, 2001.

Kurokawa, J., Ohara, T., Morikawa, T., and Hanayama, S.: Emissions of air pollutants and greenhouse gases over Asian regions during 2000–2008: Regional Emission inventory in ASia (REAS) version 2, *Atmospheric Chemistry & Physics*, 13, 10049-10123, 2013.

Ohara, T., Akimoto, H., Kurokawa, J., Horii, N., Yamaji, K., Yan, X., and Hayasaka, T.: An Asian emission inventory of anthropogenic emission sources for the period 1980–2020, *Atmos. Chem. Phys.*, 7, 4419-4444, 10.5194/acp-7-4419-2007, 2007.

Olivier, J. G. J., Bouwman, A. F., Hoek, K. W. V. D., and Berdowski, J. J. M.: Global air emission inventories for anthropogenic sources of NO<sub>x</sub>, NH<sub>3</sub> and N<sub>2</sub>O in 1990, *Environmental Pollution*, 102, 135-148, 1998.

Russell, A. R., Perring, A. E., Valin, L. C., and Bucsele, E. J.: A high spatial resolution retrieval of NO<sub>2</sub> column densities from OMI: method and evaluation, *Atmospheric Chemistry & Physics*, 11, 12411-12440, 2011.

Streets, D. G., Bond, T. C., Carmichael, G. R., Fernandes, S. D., He, D., Klimont, Z., Nelson, S. M., Tsai, N. Y., and Wang, M. Q.: An inventory of gaseous and primary aerosol emissions in Asia in the year 2000, *Journal of Geophysical Research Atmospheres*, 108, GTE 30-31, 2003.

Sun, Q., and Wang, M.: Ammonia Emission and Concentration in the Atmosphere over China, *Scientia Atmospherica Sinica*, 1997.

Van Damme, M., Clarisse, L., Heald, C., Hurtmans, D., Ngadi, Y., Clerbaux, C., Dolman, A., Erisman, J. W., and Coheur, P.-F.: Global distributions, time series and error characterization of atmospheric ammonia (NH<sub>3</sub>) from IASI satellite observations, *Atmospheric Chemistry and Physics*, 14, 2905-2922, 2014.

Walker, J. C., Dudhia, A., and Carboni, E.: An effective method for the detection of trace species demonstrated using the MetOp Infrared Atmospheric Sounding Interferometer, *Atmos. Meas. Tech.*, 4, 1567-1580, 10.5194/amt-4-1567-2011, 2011.

Wang, S. W., Liao, J. H., Yu-Ting, H. U., and Yan, X. Y.: A Preliminary Inventory of NH<sub>3</sub>-N Emission and Its Temporal and Spatial Distribution of China, *Journal of Agro-Environment Science*, 2009.

Wang, W. X., Lu, X. F., Pang, Y. B., Tang, D. G., and Zhang, W. H.: Geographical distribution of NH<sub>3</sub> emission intensities in China, *Actaentiae Circumstantiae*, 1997.

Whitburn, S., Van Damme, M., Clarisse, L., Bauduin, S., Heald, C. L., Hadji-Lazaro, J., Hurtmans, D., Zondlo, M. A., Clerbaux, C., and Coheur, P. F.: A flexible and robust neural network IASI-NH<sub>3</sub> retrieval algorithm, *Journal of Geophysical Research: Atmospheres*, 121, 6581-6599, 10.1002/2016JD024828, 2016.
